## Complex interactions between cis-regulatory modules in native conformation are critical for *Drosophila snail* expression

Leslie Dunipace, Anil Ozdemir and Angelike Stathopoulos

There was an error published in *Development* 138, 4075-4084.

The authors inadvertently re-displayed the image from Fig. 1D in Fig. 1B. The corrected Fig. 1 is shown below. This change does not affect or alter the results or conclusions of the study.

The authors apologise to readers for this mistake.

In addition, the authors wish to clarify that the images shown in Fig. 6A, 6B and 6C are unmanipulated versions of those shown in Fig. 5D, 5B and 5A, respectively.

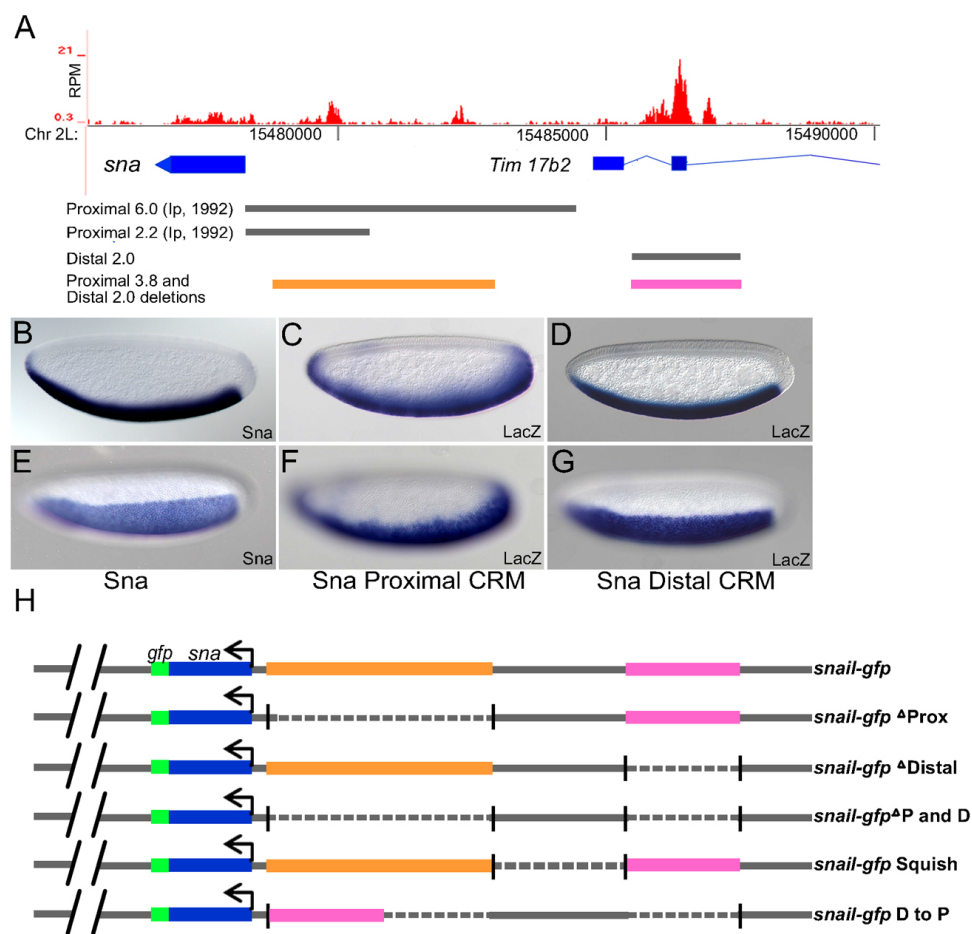

# Complex interactions between cis-regulatory modules in native conformation are critical for *Drosophila snail* expression

Leslie Dunipace, Anil Ozdemir and Angelike Stathopoulos\*

## SUMMARY

It has been shown in several organisms that multiple cis-regulatory modules (CRMs) of a gene locus can be active concurrently to support similar spatiotemporal expression. To understand the functional importance of such seemingly redundant CRMs, we examined two CRMs from the *Drosophila snail* gene locus, which are both active in the ventral region of pre-gastrulation embryos. By performing a deletion series in a ~25 kb DNA rescue construct using BAC recombineering and site-directed transgenesis, we demonstrate that the two CRMs are not redundant. The distal CRM is absolutely required for viability, whereas the proximal CRM is required only under extreme conditions such as high temperature. Consistent with their distinct requirements, the CRMs support distinct expression patterns: the proximal CRM exhibits an expanded expression domain relative to endogenous *snail*, whereas the distal CRM exhibits almost complete overlap with *snail* except at the anterior-most pole. We further show that the distal CRM normally limits the increased expression domain of the proximal CRM and that the proximal CRM serves as a 'damper' for the expression levels driven by the distal CRM. Thus, the two CRMs interact in cis in a non-additive fashion and these interactions may be important for fine-tuning the domains and levels of gene expression.

**KEY WORDS:** Cis-regulatory modules, Gene expression, *Drosophila melanogaster*, *snail*, Developmental patterning, Repression, Hucklebein

## INTRODUCTION

A number of cis regulatory modules (CRMs) have recently been identified that support concurrent expression of individual genes in similar spatiotemporal profiles in early *Drosophila* embryos, as well as later in development (e.g. Frankel et al., 2010; Hong et al., 2008; Zeitlinger et al., 2007). For the most part, these secondary CRMs were identified as a result of ChIP-chip and ChIP-seq analyses as regions of occupancy located at a distance from genes of interest, up to 10 kb or more (e.g. Li et al., 2008; Ozdemir et al., 2011; Sandmann et al., 2007; Zeitlinger et al., 2007). These newly identified CRMs have been described as being redundant to previously identified promoter-proximal located CRMs and, most recently, it has been proposed that they function to provide robustness to environmental or genetic perturbation (Frankel et al., 2010; Perry et al., 2010). Moreover, in vertebrate genomes it has been shown that many genes have multiple CRMs active concurrently, and that deletion of one cis-regulatory module can have no observable effect on the gene expression pattern (e.g. Ghiasvand et al., 2011; Xiong et al., 2002). Therefore, identifying why multiple CRMs of similar spatiotemporal expression domains are active simultaneously is a problem of general interest.

Here, we focus on analysis of the *snail* (*sna*) locus in *Drosophila*. *sna* encodes a transcription factor containing Zn-finger DNA-binding domains that predominantly functions to repress the expression of a number of genes from ventral regions of the embryo (e.g. Cowden and Levine, 2002; De Renzis et al., 2006; Ip

et al., 1992a). As such, *Snail* is an important patterning molecule that influences the mesoderm-mesectoderm-neurogenic ectoderm boundary (Kosman et al., 1991; Leptin, 1991). Although a CRM supporting expression similar to *sna* was isolated almost 20 years ago by standard *lacZ* reporter gene constructs from a promoter proximal location, even 6.0 kb of upstream sequence failed to completely represent native *sna* expression, which exhibits very sharp anterior-posterior and lateral boundaries (Ip et al., 1992b). Since then, the predominant view in the field has been that synergy between the Dorsal and Twist transcription factors, which is present in ventral gradients within early embryos, functions to specify the sharp *sna* dorsal boundary (Ip et al., 1992b; Zinzen et al., 2006), and that the sharp posterior boundary is defined by the repressor Hucklebein (Reuter and Leptin, 1994). Yet the promoter proximal CRM of *sna* does not exhibit either of these sharp borders, despite the fact that it encompasses the region all the way up to the adjacent upstream gene (Ip et al., 1992b).

In general, it is a common assumption in the field that CRMs located in promoter-proximal locations are required to support gene expression. Thus, although it was noticed that the pattern of the promoter-proximal CRM was expanded relative to endogenous *sna*, the existence of another CRM to serve as a vehicle for repressors was not proposed upon the initial characterization of the reporter gene pattern (Ip et al., 1992b). It is a common finding that CRMs do not always support expression in the exact same domain as the genes they regulate, but in the past this was explained away as a flaw inherent to reporter gene assays. For example, the CRM supporting expression within stripes 3/7 of the *even-skipped* (*eve*) gene does not exhibit equivalent effects in *knirps* mutants as does the endogenous *eve* gene: the expression of the reporter gene expands into the midsection, whereas stripes 3/7 associated with the endogenous *eve* gene retain sharp boundaries (Frasch and Levine, 1987; Small et al., 1996).

Division of Biology, California Institute of Technology, 1200 East California Boulevard, MC114-96, Pasadena, CA 91125, USA.

\*Author for correspondence (angelike@caltech.edu)

More recently, however, additional CRMs have been identified sharing similar spatiotemporal profiles to previously characterized CRMs, including one that shares close similarity with the *sna* expression pattern (Ozdemir et al., 2011; Perry et al., 2010). Another recent study presumably labeled this CRM as a ‘shadow’ enhancer because it is located at a distance from the *sna* gene, whereas the proximally located CRM was defined as the primary acting enhancer (Perry et al., 2010).

To provide insight into the functions of CRMs associated with the *sna* locus in the *Drosophila* early embryo, we undertook a genetic approach towards studying cis-regulatory control using BAC recombineering and site-directed transgenesis to assay the domain and level of expression supported by concurrently functioning CRMs. We focused on the distinction between the proximal and distal *sna* CRMs, which control early embryonic expression, in particular on the patterns and levels of expression supported by each, as well as their abilities to support *Snail* function.

## MATERIALS AND METHODS

### Fly stocks

*Adh<sup>77</sup>sna<sup>1</sup>cn<sup>1</sup>vg<sup>1</sup>/CyO*, and *sna<sup>18</sup>/CyO* fly stocks were used (BDSC) after rebalancing with *CyO ftz-lacZ* marked balancer. The proximal 2.2 kb and 6 kb *lacZ* reporter lines and F10 line (*hsp83-Toll10B-bcd3’UTR*) have been published previously (Huang et al., 1997; Ip et al., 1992b).

### Cloning and generation of *lacZ* constructs

Enhancer sequence for the distal enhancer was amplified from genomic DNA using Sna-Dist 2kb-f (5’-AATTGGTACCACAATTA-GCTGCCGTTTGCAGC-3’) and Sna-Dist 2kb-r (5’-AATTG-GTACCTGTAGCACCTTGAACCTTGTGTG-3’) and cloned into the *KpnI* site of the *eve<sub>promoter</sub>-lacZ-attB* vector (Lieberman and Stathopoulos, 2009). Site-directed transgenesis system was used to create reporter lines (Bischof et al., 2007). The 86Fb fly stock with attP landing site was injected in house with reporter constructs to generate transgenic lines.

### Generation of 25 kb *sna* rescue constructs

The 25 kb *sna* P[acman] construct was generated using recombineering mediated gap repair performed using SW105 cells as described previously (Venken et al., 2006). The BAC encompassing the *sna* gene (BACR23104) was obtained from the BacPac Resource Center and the attB-P[acman]-Ap<sup>R</sup> was modified to contain ~600 bp homology arms to the region of interest. Insertion of GFP just before the stop codon of *sna* was performed using a GFP-*frt*-kan-*frt* plasmid and the kan cassette was removed after insertion as described previously (Lee et al., 2001).

Deletion, rearrangement and mutation of the enhancer regions was carried out using the *galK* system (Warming et al., 2005). All final constructs were isolated and electroporated into EPI300 cells (Epicenter) and the copy number was induced using Fosmid Autoinduction Solution (Epicentre) according to the manufacturers instructions. The constructs were isolated using Nucleobond EF plasmid midi prep kits (Clontech). P[acman] constructs were injected into line 23648 (BDSC) at a concentration of 0.5-1 µg/µl in water using standard techniques. All primers used for gap repair and recombineering are listed in Table S1 in the supplementary material.

### Rescue experiment

Lines were created that contained *sna<sup>18</sup>/CyO ftz-lacZ* and one of the *sna* BAC constructs. Males from these lines were crossed to virgin *Adh<sup>77</sup>sna<sup>1</sup>cn<sup>1</sup>vg<sup>1</sup>/CyO ftz-lacZ*. Separate vials were placed at 25°C, 29°C and 18°C. All transgenic flies were counted and the total number of straight wing flies (i.e. *sna* mutants) was compared with the total number of transgenic flies. The final percentage of straight wing flies for each experiment was then divided by 33%, which would be the expected result were the rescue to be perfect.

We note key distinctions between our construct design and that of another recent study of the *sna* locus which used a similar approach (Perry et al., 2010): (1) our transgene functions to rescue a *sna* mutant (i.e. *sna<sup>1</sup>/sna<sup>18</sup>*) to viability, whereas the other group was limited to assaying early gastrulation defects presumably because a large deficiency background was used; (2) our deletions were guided by our own Twist ChIP-seq data (Ozdemir et al., 2011), effectively guiding definition of the distal CRM as a larger region (~2.0 kb), (3) a spacer sequence (i.e. ampicillin resistance cassette) was not put in place of deletions in our constructs, which allowed us to assay whether native spacing is important; (4) the *sna*-coding sequence, which may possibly influence cis-regulatory mechanism or stability of transcripts, was left intact within our reporter constructs; and (5) the other group did not assay the gastrulation defects associated with the distal CRM delete large transgene but relied on cDNA rescue data conducted previously (Hemavathy et al., 2004).

### In situ hybridization

Embryos were fixed and stained following standard protocols. Antisense RNA probes labeled with digoxigenin, biotin or FITC-UTP were used to detect reporter or in vivo gene expression as described previously (Jiang and Levine, 1993; Kosman et al., 2004). Primary antibodies used were: rabbit anti-Eve (provided by M. Frasch, University of Erlangen-Nürnberg, Germany), guinea pig anti-Twist (provided by M. Levine, UC Berkeley, CA, USA), mouse anti-Dorsal (7A4-s from the Hybridoma Bank) and rabbit anti-Histone H3 (Abcam).

### Mean intensity quantification

Images of three embryos from each construct were taken using identical parameters. From each embryo, a square of 345 µm<sup>2</sup> was extracted and analyzed for mean intensity using the LSM Image Examiner program (Zeiss). This was repeated three times in each embryo within the *sna* stripe in consistent locations from embryo to embryo. A negative control square of the same size was also analyzed for each embryo. For each measurement within the *sna* stripe, the negative measurement from that embryo was subtracted and then the measurements were averaged and a standard deviation was determined from the nine measurements.

## RESULTS

### Multiple CRMs in proximity to the *sna* gene support expression in overlapping domains

Previously published Twist-ChIP-seq binding data identified multiple peaks of Twist occupancy to DNA in proximity to the *sna* gene (Fig. 1A) (Ozdemir et al., 2011). By far, the largest peaks were detected ~7 kb upstream of *sna* gene within the intron of another gene, *Tim17b2*. The two proximal Twist occupied regions are covered by the previously studied 2.2 kb and 6 kb enhancer constructs (‘proximal CRM’) (Ip et al., 1992b). A 2.0 kb DNA fragment from the *Tim17b2* intronic sequence, containing several closely positioned peaks of Twist occupancy, was also assayed in a reporter context (‘distal CRM’) (Ozdemir et al., 2011).

By analysis of *lacZ* reporter transgenes, we found that both these CRMs (proximal and distal) supported expression in the ventral region of the early embryo in patterns that are spatiotemporally similar but not identical. In contrast to the broadened expression of the proximal CRM fragment (Fig. 1C,F), the distally located CRM fragment supports high-level expression that is refined, sharp and similar to the endogenous *sna* expression pattern (Fig. 1D,G, compare with 1B,E). It should be noted that our tested DNA fragment was defined by Twist ChIP-seq analysis and was larger in size than the one recently tested by another group (i.e. 2 kb versus 1.2 kb) (Perry et al., 2010), a study in which no spatial distinctions between the patterns supported by the proximal and distal CRMs was noted.

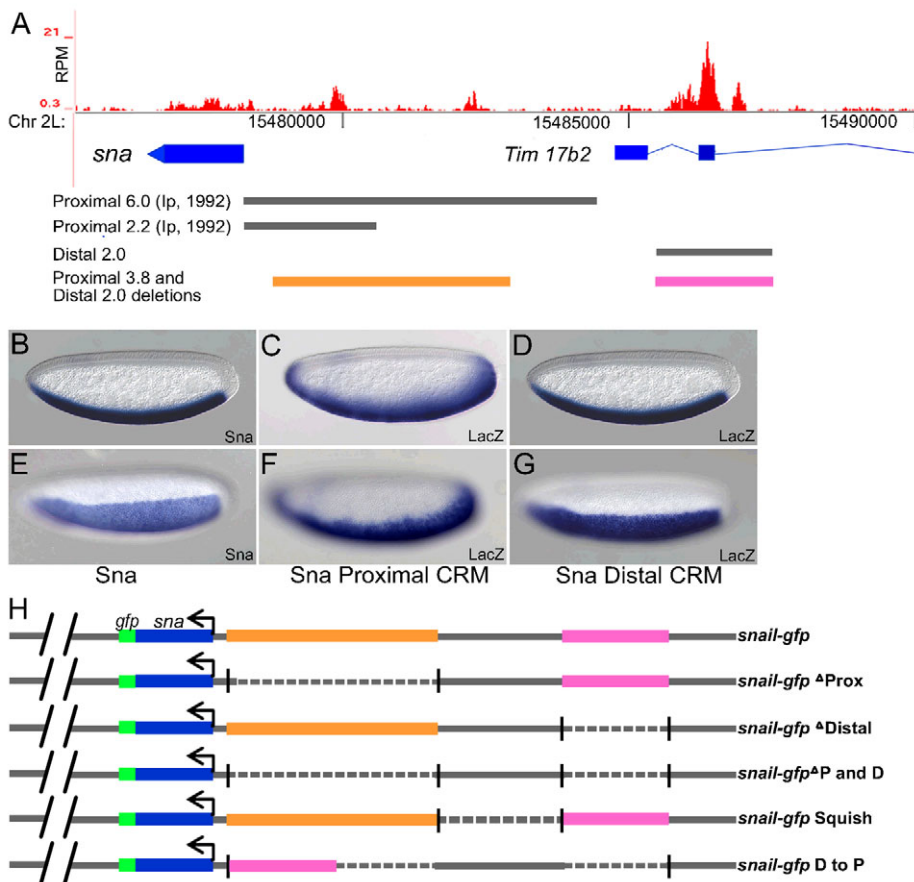

**Fig. 1. Distinct regions in the vicinity of the *snail* gene regulate expression in ventral regions of early embryos.** (A) Twist ChIP-seq defined binding (shown in reads per million, RPM) was identified previously in three domains upstream of *snail*:  $-1.6$ ,  $-3.4$  and  $-7$  kb (Ozdemir et al., 2011). We created a *lacZ* reporter construct of the  $\sim 2$  kb distal region in order to encompass the entire region defined by our Twist ChIP-seq analysis, and compared with two *lacZ* reporter constructs assayed previously: proximal 2.2 kb and 6.0 kb constructs (gray lines) (Ip et al., 1992b), regions deleted in the context of a 25 kb rescue construct are shown in orange (proximal) and pink (distal). (B–G) In situ hybridization data using riboprobes to detect either *snail* transcript in wild-type embryos (B,E) or *lacZ* transcript in transgenic embryos containing the *snail* 2.2 kb promoter proximal reporter (C,F) or the *snail* distal 2.0 kb reporter (D,G). In this and subsequent figures, embryos are oriented with anterior towards the left. (B–D) Sagittal views; (E–G) ventrolateral surface views. (H) A  $\sim 25$  kb *snail* rescue transgene was modified by insertion of *gfp* as an in-frame fusion to 3' end of the *snail* gene. Various deletions were created as shown.

### Assay of CRM function using larger reporter transgenes in which native context is retained or modified

To analyze how expression of the *snail* gene is controlled in the early embryo, we created a 24.8 kb P[acman] construct encompassing the *snail* gene, as well as flanking DNA sequences using recombineering methods (Fig. 1H) (Venken et al., 2006). We isolated stable transgenic lines using site-directed methods and determined that this DNA sequence can complement the *snail* mutant, suggesting that the cis-regulatory information encoded within this  $\sim 25$  kb DNA segment is sufficient to support the essential aspects of *snail* expression. To create the reporter construct, we recombineered the *gfp* cDNA sequence into the *snail* locus as an in-frame C-terminal fusion to Snail protein (Fig. 1H, '*snail-gfp*'), allowing us to monitor transgenic expression of *snail-gfp* using a *gfp* riboprobe (see below).

As our goal was to provide insight into cis-regulatory mechanisms regulating *snail* expression, we created five deletion constructs within the 25 kb *snail-gfp* construct using our Twist ChIP-seq data as a guide: (1) a *snail* promoter proximal deletion of 3.8 kb containing two peaks of Twist binding, including most of the 2.2 kb minimal *snail* enhancer identified by Ip et al. (Ip et al., 1992b), but leaving the 500 bp promoter proximal region and including more upstream sequence that we found was also bound by Twist in the early embryo (' $\Delta$  Proximal'); (2) a distal deletion of 2.0 kb, which includes three major peaks of Twist binding, located in the intron of the gene upstream of *snail*, *Tim17b2* (' $\Delta$  Distal'); (3) a double-deletion of both the proximal and distal CRMs (' $\Delta$  P and D'); (4) a deletion of the intervening sequence, present between the proximal and distal

CRMs ('squish'); and (5) a construct in which the distal CRM is moved to the proximal position, in a double-delete background ('D to P') (Fig. 1H). 500 bp directly upstream of the *snail*-coding sequence was left unmodified in all cases, with the purpose of leaving the promoter intact.

As both the distal and proximal CRMs supported *snail* expression during early embryogenesis, we investigated whether they function redundantly through analysis of these recombineered reporter transgenes. The proximal CRM deletion (' $\Delta$  Proximal') supported *gfp* expression that was comparable with *gfp* expression from the full *snail-gfp* rescue construct (Fig. 2B, compare with 2A). Moreover, *gfp* expression similar to that supported by *snail-gfp* was detected in the constructs that moved the distal promoter to a proximal location ('D to P') and the construct that deleted the intervening sequence ('squish') in the early embryo (data not shown). By contrast, deletion of the distal CRM (' $\Delta$  Distal') supported weaker expression (Fig. 2C), and the construct that deletes both ('double delete') lacked early expression altogether (data not shown). Based on pattern alone, the distal CRM appeared more faithful to the *snail* endogenous expression domain.

### Genetic assay of CRM function by *snail* mutant rescue

To determine whether *snail* expression supported by these transgenes was functionally equivalent, we assayed the ability of these transgenes to rescue a *snail* mutant. The wild-type reporter and five modified versions, were introduced into a *snail* mutant background (*snail*<sup>1</sup>/*snail*<sup>18</sup>) and assayed for their ability to support viability. We found that the native *snail* gene rescued at 91% (Table



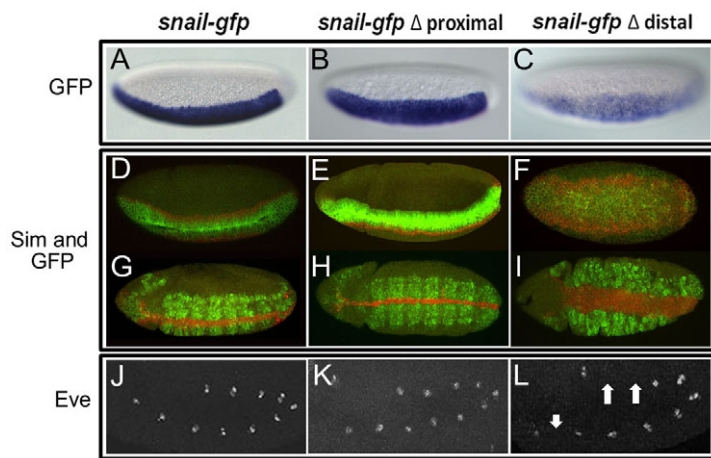

**Fig. 2. The distal CRM is required to rescue gastrulation and Eve cell specification defects.** (A-C) In situ hybridization of cellularized wild-type embryos (stage 5) containing *snail-gfp* construct using a *gfp* riboprobe and alkaline phosphatase staining procedure. *snail-gfp* (A) and *snail-gfp*  $\Delta$ Proximal (B) constructs supported sharp lateral and posterior borders, whereas the *snail-gfp*  $\Delta$ Distal (C) construct was weaker and exhibited expanded lateral and posterior boundaries. (D-I) Fluorescent in situ hybridizations of *snail<sup>1</sup>/sna<sup>18</sup>* mutant embryos using *sim* (red) and *gfp* (green) riboprobes to detect *snail* construct reporter expression and effects on gastrulation through assay of *sim*. *snail* mutant embryos containing either the full-length construct *snail-gfp* (D,G); the proximal delete construct *snail-gfp*  $\Delta$ Proximal (E,H); or the distal delete construct *snail-gfp*  $\Delta$ Distal (F,I) are shown. (J-L) Eve expression in *snail* mutant germ-band elongated embryos containing *snail-gfp* (J), *snail-gfp*  $\Delta$ Proximal (K) or *snail-gfp*  $\Delta$ Distal (L). Arrows indicate gaps in eve expression. (See Fig. S1 in the supplementary material for *snail-gfp* 'D to P' and 'squish images', also see Fig. S2 in the supplementary material for late Eve expression.)

1) but there was significant, but only partial, rescue with the *snail-gfp* fusion constructs (76%) (data not shown). For this reason, we assayed the ability of native *snail* gene constructs, unmodified with *gfp*, to support rescue.

The 25 kb *snail* transgene and the delete proximal CRM constructs rescued the *snail* mutant phenotype; 91% and 82% of expected F1 progeny, respectively, were obtained in rescue crosses (Table 1). By contrast, the distal CRM delete construct completely failed to rescue the *snail* mutant, as did the double delete ' $\Delta$  P and D' construct. The 'squish' construct, which removes sequence between the proximal and distal CRMs, also failed to complement the mutant. These results support the conclusion that the distal CRM is required to support viability. In turn, the fact that more than 80% of the expected flies emerged from the *snail* rescue cross with proximal CRM delete transgene suggested that the proximal CRM is not required to support viability.

To further study functional differences between CRMs, we examined the ability of our constructs to support viability at various temperatures: 25°C, 29°C and 18°C. The proximal CRM delete construct showed decreased viability at higher temperature, with 36% viability supported at 29°C when compared with 82% at 25°C; yet at 18°C, we found the rescue was also high at 94% (Table 1). However, we found that the distal CRM delete construct did not rescue at any temperature tested: 0% viability at 18°C, 25°C, and 29°C; further evidence that the distal CRM is the primary CRM responsible for supporting *snail* expression.

### Deletion of the distal CRM, specifically, has consequences on gastrulation

Next, we examined whether these CRMs have similar or different roles during gastrulation. The constructs containing the distal CRM rescued the gastrulation defects of *snail* mutants [i.e. ' $\Delta$  Proximal' (Fig. 2E,H) and 'squish' and 'D to P' (see Fig. S1 in the supplementary material), compare with full length *snail-gfp* (Fig. 2D,G)]. By contrast, constructs without the distal CRM exhibited gastrulation defects (i.e. ' $\Delta$  Distal', Fig. 2F,I). In the absence of the distal CRM, not only was *single-minded* (*sim*) expression aberrant, with expansion into a broad domain compared with the single line of cells found in wild-type embryos, but invagination was non-uniform and presumably contributed to unequal mesoderm spreading (Fig. 2F,I). As *sim* is directly repressed by the Snail transcription factor in gastrulating embryos (Kasai et al., 1992), these results indicated that the level of *snail* expression in the *snail*

mutant background supported by *snail-gfp*  $\Delta$  Distal is insufficient to fully support function at this stage of development, resulting in an expansion of the *sim* domain.

As an assay for possible later phenotypes, we examined expression of *even-skipped* (*eve*). *eve* encodes a homeodomain transcription factor necessary for dorsal mesoderm lineage specification (Frasch et al., 1987), and its lateral expression in 11 clusters of cells on either side of the embryo at stage 11 can be used as an indicator for proper mesoderm spreading. In rescue experiments in which the distal CRM was absent, *eve* expression was aberrant as gaps in expression were detected in all of the embryos examined (Fig. 2L, arrows). By contrast, constructs that removed the proximal CRM, leaving the distal CRM intact, exhibited normal gastrulation (invagination and *sim* expression, Fig. 2E,H), as well as normal mesoderm spreading and specification even at later stages of embryogenesis (Eve expression; Fig. 2K). Even when the temperature was raised to 29°C, no obvious mesoderm specification defects in the trunk of the embryos were observed in the absence of the proximal CRM (see Fig. S2 in the supplemental material). Our data for rescue of the *snail<sup>1</sup>/sna<sup>18</sup>* background demonstrated that the distal CRM is required to support gastrulation, but that the proximal CRM is not required or supports a minor role (such as supporting expression at the anterior, see below).

The proximal CRM deletion of 3.8 kb removes multiple tissue-specific enhancers, a minimum of three: one module from 1.2 kb to 2 kb supports expression in ventral regions of the early embryo (e.g. Fig. 1C) and two other modules, one from 0.4-0.9 kb and another from 2.2-2.8 kb, support expression in the peripheral nervous system (PNS) and central nervous system (CNS), respectively, at later stages of embryogenesis (Ip et al., 1994; Ip et al., 1992b). We observed changes in the PNS and CNS expression in constructs that delete the proximal CRM, but no effect on expression in these domains was observed in the constructs that delete the distal CRM (see below).

### Multiple CRMs support *snail* expression in germ-band elongated embryos and are organized on the chromosome in a manner that potentially minimizes dominant effects of repressors

In the course of our *snail* rescue experiments, we found that a construct removing the intervening sequence between distal and proximal CRMs was not able to complement the mutant (Table 1,

**Table 1. The distal enhancer is required for viability at all temperatures, whereas the proximal enhancer is required conditionally at high temperatures**

| Transgene                                                                                                   | Percentage rescue |             |             |
|-------------------------------------------------------------------------------------------------------------|-------------------|-------------|-------------|
|                                                                                                             | 25°C              | 18°C        | 29°C        |
|  Sna rescue construct      | 91% (n=170)       | 100% (n=52) | 100% (n=23) |
|  Sna Δ proximal CRM        | 82% (n=51)        | 94% (n=29)  | 36% (n=34)  |
|  Sna Δ distal CRM          | 0% (n=44)         | 0% (n=18)   | 0% (n=22)   |
|  Sna Δ proximal and distal | 0% (n=47)         |             |             |
|  Sna squish                | 0% (n=95)         |             |             |

Schematics of each of the constructs are shown on the left. Percentage rescue indicates the number of *snail*/*snail*<sup>ts</sup> flies counted out of the total number of flies present, then divided by what would be considered a complete rescue (i.e. 33% of total flies). *n* is the total number of flies counted. Because the 'Δ proximal and distal' and 'squish' constructs did not rescue at 25°C, they were not further analyzed at the other temperatures.

'*snail-gfp* squish'). We hypothesized that either this sequence supports another function required for viability or it influences the ability of the distal enhancer to function. To test the first possibility, we examined expression of *snail* in slightly older embryos, ones that were undergoing germ-band elongation. Previous studies have documented *snail* expression at this stage within the ectoderm and in malpighian tubule (MT) precursor cells (Alberga et al., 1991; Ip et al., 1994). From analysis of germ-band elongated embryos (stage 9), we observed that *snail* was also expressed at this stage in the posterior midgut (PMG) and in the head (possibly marking either anterior midgut and/or head mesoderm) (Fig. 3A) (Alberga et al., 1991; de Velasco et al., 2006).

The patterns of reporter expression supported by each *snail-gfp* transgene were analyzed (Fig. 3B). When the proximal CRM region was deleted, we found that a subset of expression in the ectoderm was lost (i.e. pattern 'Ect1') (Ip et al., 1994). Yet upon loss of the 3.8 kb proximal CRM, expression in the neurogenic ectoderm was retained in stripes within the trunk but was absent in the midsection domain of the embryo (i.e. pattern 'Ect2'), suggesting that other sequences also impact ectodermal expression. We deduced that the CRM responsible for supporting expression in the Ect2 pattern is most probably present in the DNA sequence of our rescue construct downstream of *snail* (~14 kb), because none of the modified constructs we tested ever affected expression of the reporter in this domain. Next, we found that expression within the MT precursor cells was completely lost when the distal CRM was deleted (Fig. 3B, delete distal: 'Δ distal' and double delete: 'Δ P and D') and that the pattern was retained as long as the distal CRM was present, even if located in a different location. When the distal CRM was moved to the proximal position ('D to P'), there was an overall diminishment of expression in all domains but the MT precursor cell expression was retained. These results suggested that the 2.0 kb DNA associated with the distal CRM supports expression in the MT precursor cells in addition to its function in supporting early *snail* expression in ventral regions of the embryo. Consistent with this view, when the distal CRM *lacZ* construct was examined, expression in MT precursor cells within embryos at stage 9 was also observed (data not shown).

Last, the 'squish' construct was the only construct found to cause loss of expression in the head and PMG, suggesting that this intervening sequence contains CRMs that support these *snail* expression domains. Loss of expression in these domains may be responsible for the inability of this construct to rescue the mutant. The 'squish' construct also resulted in a partial to complete loss of expression within the Ect1 region (Fig. 3B, gray box). Although it is possible that deletion of the intervening sequence from -4.3 to

-7.2 kb, which was removed by the 'squish', could influence neuronal expression; this is unlikely as full *snail* expression within the CNS and PNS is observed with a transgene that includes only the most proximal 2.8 kb (Ip et al., 1994).

We hypothesized that by moving the two CRMs into closer proximity by deleting the intervening DNA ('squish'), repressors acting within the distal CRM may function to repress expression in the ectoderm normally supported by the proximal CRM. This idea, together with the fact that the distal CRM exhibited spatially refined expression relative to the proximal CRM in the early embryo (e.g. Fig. 1B-G), led us to investigate whether repressor(s) that act to limit *snail* expression function through the distal CRM.

### Repressors predominantly function through the distal CRM to regulate the posterior and dorsal boundaries of the *snail* expression domain within the early embryo

It has previously been shown that the Hucklebein (Hkb) transcription factor, which is expressed at both the anterior and posterior poles, functions as a repressor to define the posterior boundary of *snail* expression (Goldstein et al., 1999; Reuter and Leptin, 1994). In *hkb* mutants, posterior *snail* expression is expanded into the pole and anterior expression is expanded beyond the tip and into the dorsal region of the embryo. Upon examination of the *snail-gfp* construct in which the proximal CRM was deleted, we found that *gfp* expression was excluded from the posterior *hkb* expression domain, similar to endogenous *snail* expression (Fig. 4B, compare with 4A). This result suggested that Hkb can function to repress the *snail* posterior boundary, even when the proximal CRM is removed. By contrast, *gfp* expression was expanded into the posterior end of the embryo upon deletion of the distal CRM (Fig. 4C, compare with 4A).

*snail* and *hkb* expression domains overlap at anterior regions of the embryo. Upon closer analysis of the *snail-gfp* proximal delete construct, we found that the *gfp* expression domain recedes relative to *snail*, such that the boundary of expression was more ventrally located and sharper relative to wild type (Fig. 4E). A similar effect on *snail* expression has been observed previously in *bicoid* mutants (Reuter and Leptin, 1994). However, in comparison with the expression domain supported by the *snail-gfp* distal CRM delete, we found that the *snail* expression domain was expanded more dorsally at the anterior of the embryo than normal (Fig. 4F), similar to that seen in *hkb* mutants (Reuter and Leptin, 1994). Collectively, these results suggest the proximal CRM supports Bicoid-mediated activation at the anterior of the embryo and that the distal CRM supports Hkb-mediated repression at both embryonic poles.

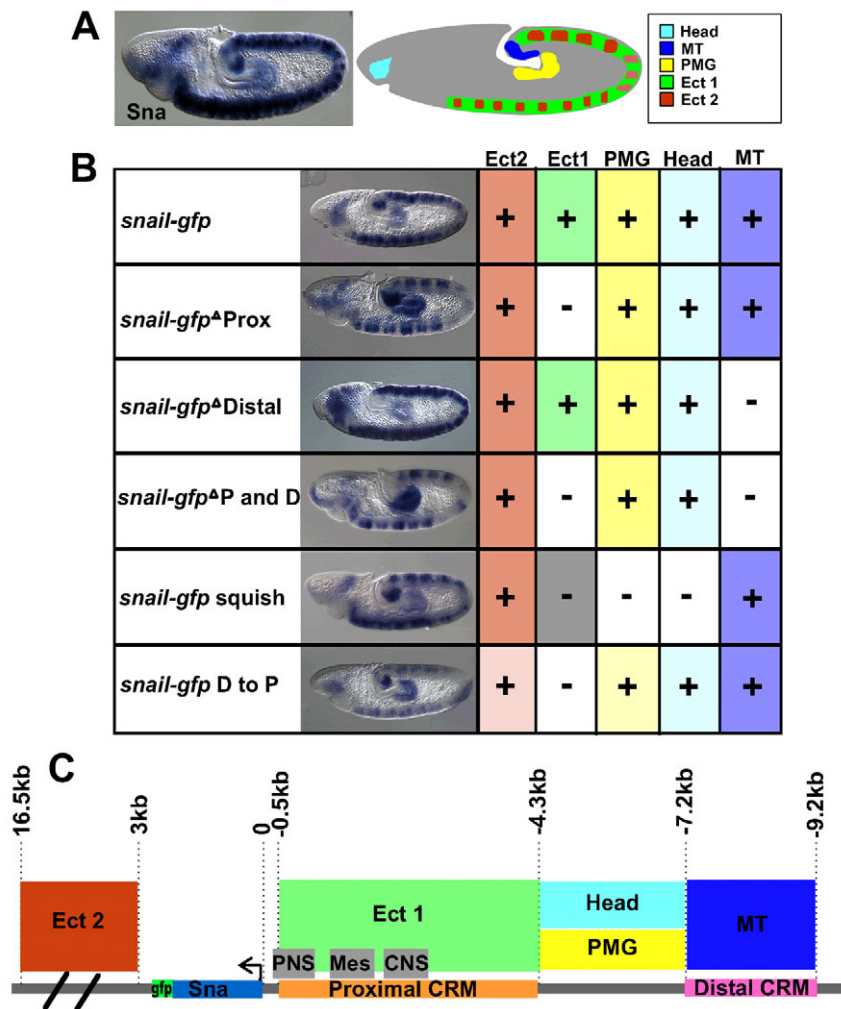

**Fig. 3. Expression of *snail* is regulated by at least four CRMs, the spacing of which is important to support patterning.** (A) In embryos that have undergone germband elongation (stage 9), *snail* is expressed in at least five different regions, as detected by in situ hybridization using a *snail* riboprobe (left) and schematized to demarcate the patterns (right): (1) within the head; (2) in posterior midgut primordium (PMG); (3) in malpighian tubule (MT) precursor cells; and in the ectoderm within two domains – either (4) broadly expressed (Ect1) or (5) in stripes (Ect2). (B) The gain or loss of specific expression patterns in a series of modified large transgenes. Colors in the chart correspond to the region key in the schematic in A, with weaker colors indicating lower expression than wild type and the gray box indicating loss of expression that was potentially due to repression. (C) The genomic region surrounding *sna* is divided into a minimum of four CRMs and marked with the expression pattern that each CRM supports in the embryo based on the expression data in B. Gray boxes associated with the proximal enhancer denote regions previously described (Ip et al., 1994) to support expression in the peripheral nervous system (PNS), mesoderm (Mes) and central nervous system (CNS).

The distal CRM supported a refined *sna* expression boundary not only at the poles where *Hkb* is functioning but also in lateral regions of the embryo. Because the *snail-gfp* reporters are also recognized by a riboprobe to *snail* (such that endogenous and reporter expression cannot be distinguished by in situ hybridization), we chose to assay the *lacZ* reporter constructs of the two CRMs in comparison with endogenous *snail* to visualize the patterns at the dorsal boundary of expression. The distal CRM dorsal border was sharp and comparable with the endogenous *snail* pattern, whereas the proximal CRM supported a patchy expression that was weak and sporadically extended beyond the *snail* border (Fig. 4H, compare with 4G). Although the dorsal border of the proximal CRM is mostly encompassed by the endogenous *snail* border, the extension of the proximal CRM even by a few cells beyond the endogenous *snail* border indicates that this CRM in isolation has no (or reduced) responsiveness to a putative repressor responsible for supporting the sharp boundary (see below).

Previous studies using intersecting dorsoventral patterning cues had provided evidence that one or more repressors might be required for the establishment of the *sna* lateral border (Huang et al., 1997). In these experiments, an ectopic gradient of nuclear Dorsal (a transcription factor pivotal for dorsoventral patterning) was specified along the anterior-posterior axis by localizing constitutively active Toll receptor to the anterior end of embryos by a transgene, ‘F10’ (Huang et al., 1997). The result was an embryo containing two dorsal-ventral patterning axes that intersect

(see Fig. S3A in the supplementary material), with loss of *sna* expression at the intersection; the existence of a laterally acting repressor was postulated (Huang et al., 1997). Although the identities of such laterally acting repressors (‘repressor X’) have remained uncertain, we nevertheless assayed whether the proximal and/or distal CRMs are required to support the ability to repress *sna* in this manner.

When the distal CRM *lacZ* reporter construct was introduced into the F10 background, complete overlap with the endogenous *sna* expression domain was observed (see Fig. S3B in the supplementary material). By contrast, the expression domain was expanded both laterally and posteriorly when the proximal 2.2 kb *lacZ* construct was introduced into the F10 background (see Fig. S3C in the supplementary material). These results are consistent with the idea that both repressor X and *Hkb* function predominantly through the distal CRM to refine *sna* borders in lateral and posterior regions of the embryo, respectively, although we cannot dismiss a more minor role at the proximal CRM.

### Non-additive patterns of expression when proximal and distal CRMs are located in trans suggest cis-interactions are necessary to support patterning

Although both CRMs are present in the wild-type locus, we noticed that the *snail* gene expression pattern was not simply the summed equivalent of the domains of expression supported by the two



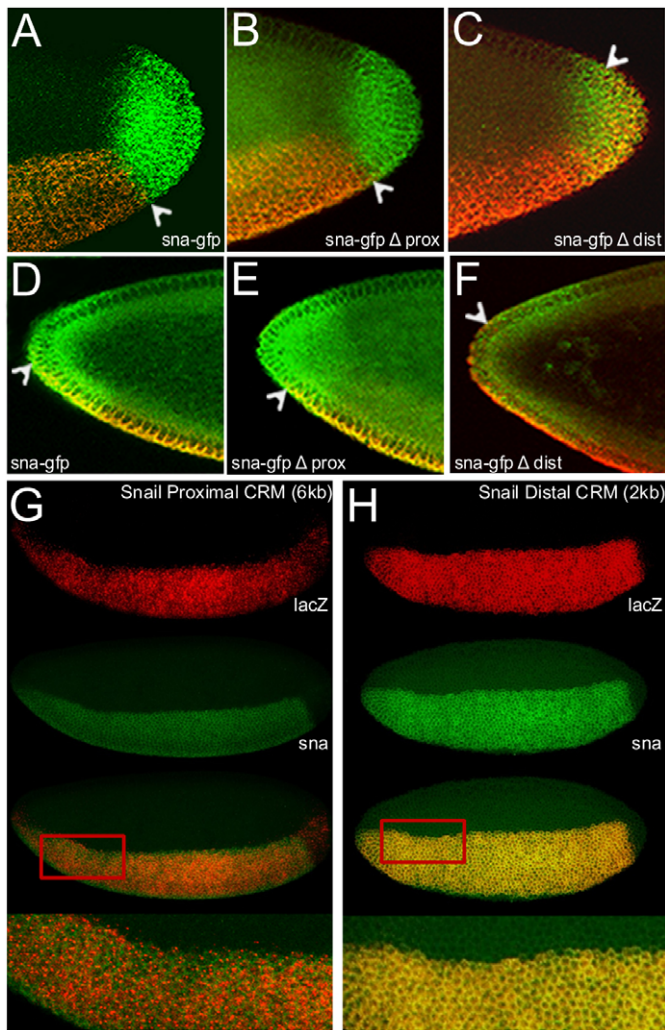

**Fig. 4. Repressors function predominantly through the distal CRM, whereas expansion toward the anterior pole requires the proximal CRM.** (A-F) Fluorescent in situ hybridization of wild-type embryos (stage 5) containing either the *sna-gfp* (A,D), *sna-gfp*  $\Delta$  Proximal (B,E) or *sna-gfp*  $\Delta$  Distal (C,F) constructs using riboprobes to detect *gfp* (red) and *hkb* (green) transcripts. Magnified images of the poles of stage 5 embryos showing the posterior (A-C) and anterior (D-F) variation in *sna-gfp* expression (red) with respect to the domain of *hkb* expression (green). The posterior images are projections, whereas the anterior images represent a single scan. Extent of *gfp* expression supported at the poles is marked by arrowheads in each case. (G,H) Ventrolateral views of in situ hybridization recognizing *lacZ* (red), driven by either the proximal CRM (G) or the distal CRM (H), and *snail* (green). The red rectangle in each indicates the area magnified in the bottom image.

CRMs. We hypothesized that repressors associated with the distal CRM might also work to define the expression supported by the proximal CRM output. This would explain why the endogenous *snail* expression domain was absent from the posterior pole and also why its lateral boundary was sharp. However, it was also possible that the level of expression supported by each CRM was so different that when both were present, the pattern supported by the distal CRM effectively masked that supported by the proximal CRM. To distinguish between these possibilities, we examined embryos containing various combinations of the proximal delete

and/or the distal delete CRM reporters, in either cis or trans conformation, and analyzed the gene expression outputs supported by each combination in terms of spatial domain (Fig. 5) and level of expression (Fig. 6).

At two copies, the proximal CRM delete construct supported refined expression (repressed at the posterior and laterally), whereas the distal CRM delete construct supported expanded expression (extending at the poles and laterally) compared with an unmodified reporter construct (Fig. 5A,B, compare with 5D), similar to expression supported by one copy of the transgenes. However, when reporter expression was assayed in an embryo containing one copy of the proximal CRM delete and one copy of the distal CRM delete transgenes, the pattern supported exhibited an expanded expression domain, most apparent at the posterior pole. This result suggested that the expression supported by the proximal CRM is not simply too weak to be observed in the presence of the expression supported by the distal CRM, but that instead repressors associated with the distal CRM normally function to refine expression at the poles and in lateral regions supported by the proximal CRM. Furthermore, these data demonstrate that repressors associated with the distal CRM cannot function in trans, but instead require a cis conformation relative to position of the proximal CRM in order to have an effect. Our results suggest that the normal pattern is a non-additive reflection of the domains of expression supported by each CRM (see Discussion).

Besides differences in domain of expression, we noticed that these constructs supported differences in levels of expression (Fig. 6). When imaged at a power and gain in which all of the constructs examined were not over-exposed, the mean intensity supported by the *sna-gfp* and *sna-gfp*  $\Delta$  distal constructs were comparable, but in comparison the expression levels supported by the *sna-gfp*  $\Delta$  proximal construct were considerably higher (~3-4 fold). Therefore, in the absence of the proximal CRM, the expression levels increased. At higher gain, however, it was observed that the *sna-gfp* expression was at least twofold higher than that of the *sna-gfp*  $\Delta$  distal (data not shown). Thus, alternately, in the absence of the distal CRM, the expression levels decreased. In addition, the *sna-gfp* *squish* construct also supported increased levels of expression relative to the *sna-gfp* construct (approximately twofold). Collectively, these results suggest that normal levels and patterns of *snail* gene expression require input from both the proximal and distal CRMs, and that effective regulation of expression levels requires proper organization of these CRMs upon the chromosome.

## DISCUSSION

In this study, we provide evidence that early *snail* expression is regulated by two concurrently acting CRMs that support gene expression patterns that are spatially and functionally different. The distally located CRM is necessary to support gastrulation as well as viability of *snail* mutants, whereas the proximal CRM is dispensable for viability except at high temperature. Furthermore, our data show these CRMs support distinct expression patterns. Although they probably share many transcription factors, the distal CRM alone is responsive to the repressor Hucklebein and the unknown laterally acting ‘repressor X’, whereas the proximal CRM alone responds to an anterior activator.

Our data suggest that the proximal CRM functions as a ‘damper’ to reduce the high levels of expression normally supported by the distal CRM. Multiple CRMs associated with a single gene may support spatiotemporally similar expression patterns, but the mean levels of gene expression supported by each can be very different.



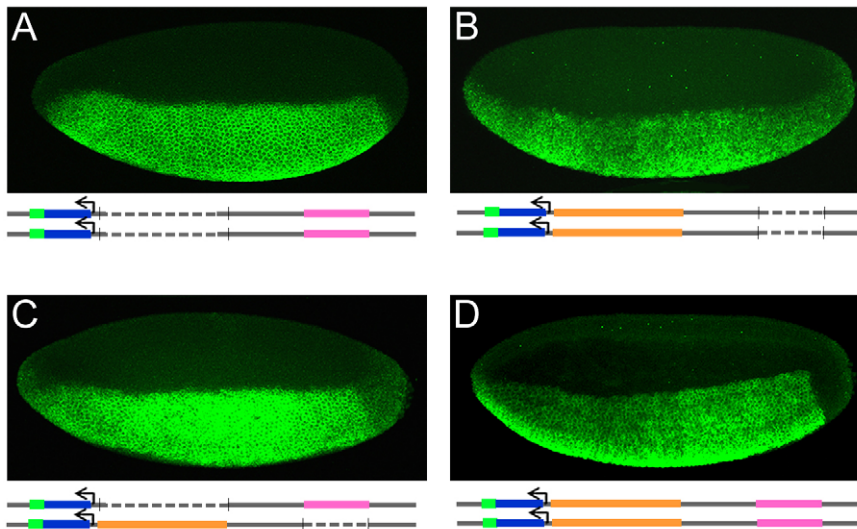

**Fig. 5. The proximal and distal enhancers function in a non-additive manner when organized in cis conformation but not in trans.** (A–D) Fluorescent in situ hybridization using a *gfp* riboprobe of stage 5 embryos expressing one of the following constructs: homozygous ‘snail-gfp  $\Delta$  proximal’ (A), homozygous ‘snail-gfp  $\Delta$  distal’ (B), heterozygous ‘snail-gfp  $\Delta$  proximal’/‘snail-gfp  $\Delta$  distal’ (C) or homozygous ‘snail-gfp’ (D). All images were captured under the same confocal settings but the brightness and/or contrast was modulated to support visual comparison of the domains of expression supported by these four transgenes.

In the case of the *snail* locus, our data show that the distal and proximal CRMs drive high or low levels of expression, respectively, within a similar domain in ventral regions of the embryo. Our results supports a model in which these two CRMs provide dual-control of expression levels, high versus low, to provide flexibility in terms of levels of *snail* expression (Fig. 6F). The requirement for the proximal CRM at high temperatures could indicate a need to more closely regulate the expression levels of *snail* in stressful environments. Such flexibility is probably advantageous and may explain why two CRMs that support similar expression patterns may be evolutionarily constrained.

Both the proximal and distal CRMs support expression not only during gastrulation in ventral regions of the embryo but in other domains at later stages of development. The distal CRM also supports expression within malpighian tubule precursors (Fig. 3), and, as was previously shown, the proximal CRM supports expression later within neuroblasts (Ip et al., 1992b). Therefore, these elements can be reused during the course of development, and may be evolutionarily retained for reasons beyond a role in canalization.

### CRMs associated with the *snail* locus function in a non-additive manner to support expression

Our results show that transcription factors associated with the distal CRM can dominantly affect the other proximally located CRM to support expression of *sna* that is refined and excluded from the posterior pole. Our data support the view that non-autonomous CRM function is responsible for the resulting pattern which is effectively non-additive, i.e. it is not simply the summed equivalent of the domains of expression supported by the two CRMs. Non-autonomous CRM function may be advantageous, providing additional flexibility by allowing individual and combined activities of CRMs based on circumstances, to support canalization. It has been demonstrated that non-additive CRM interactions also play a role defining the expression domain of another *Drosophila* early patterning gene, *sloppy-paired 1* (Prazak et al., 2010). Our data support the view that this is a more common cis-regulatory mechanism than currently appreciated. For example, even in case of the *even-skipped* gene locus that has received considerably focus, questions remain about why particular CRM behaviors are not equivalent to the behaviors of the *eve* gene itself. The expansion of a *eve* stripe 3/7 reporter gene in *knirps* mutants (Small

et al., 1996), but not the *eve* gene itself (Frasch and Levine, 1987), suggests that another repressor is required to drive proper *eve* stripe 3/7 expression and that this activity is supported through another DNA fragment. We propose that another CRM associated with the *eve* locus may aid in definition of *eve* stripes 3/7 by serving as a vehicle for additional repressors(s), similar in mechanism to regulation of *snail* gene expression shown here in this study.

### CRMs are organized along the DNA to support effective transcription

This study also supports the view that CRMs are organized in the context of the gene locus to support proper patterning and to minimize cross-repressive interactions (see also Cai et al., 1996; Small et al., 1993). We believe that the loss of Ect1 expression that we see in the ‘squish’ construct is the result of dominant repression, owing to the fact that the distal enhancer is moved in proximity to the proximal enhancer (see Fig. 3B). This would suggest that the native context of CRMs within a locus can limit interactions between elements, and may go towards explaining why enhancers in diverged species/animals tend to be found in the same general location (Cande et al., 2009; Hare et al., 2008). Similarly, the dampening of all *snail* expression patterns we observe in the ‘D to P’ construct may be due to the repressive activity of the distal CRM being moved near the promoter.

Placing binding sites for repressors near the promoter potentially limits the range of activity of a gene. Many genes involved in early development, such as *snail*, take on different roles later in development and are subject to different molecular inputs during the life of the animal. Like *snail*, the *intermediate neuroblasts defective (ind)* gene also has a distally located enhancer and another that is located in the proximal position. Similar to what we see at the *snail* locus, the distal CRM has documented repression associated with it, whereas the proximally located element functions through positive autoregulatory feedback (Stathopoulos and Levine, 2005; Von Ohlen et al., 2007). We suggest that keeping repressors located at a distance from the promoter supports flexibility in reiterative reactivation of genes throughout the course of development. However, in addition to buffering repressive crosstalk through distance, we propose that linking repression function to the presence of an activator (i.e. between CRMs concurrently active in the same cells) may also serve as an alternate mechanism to moderate non-autonomous CRM interactions; other

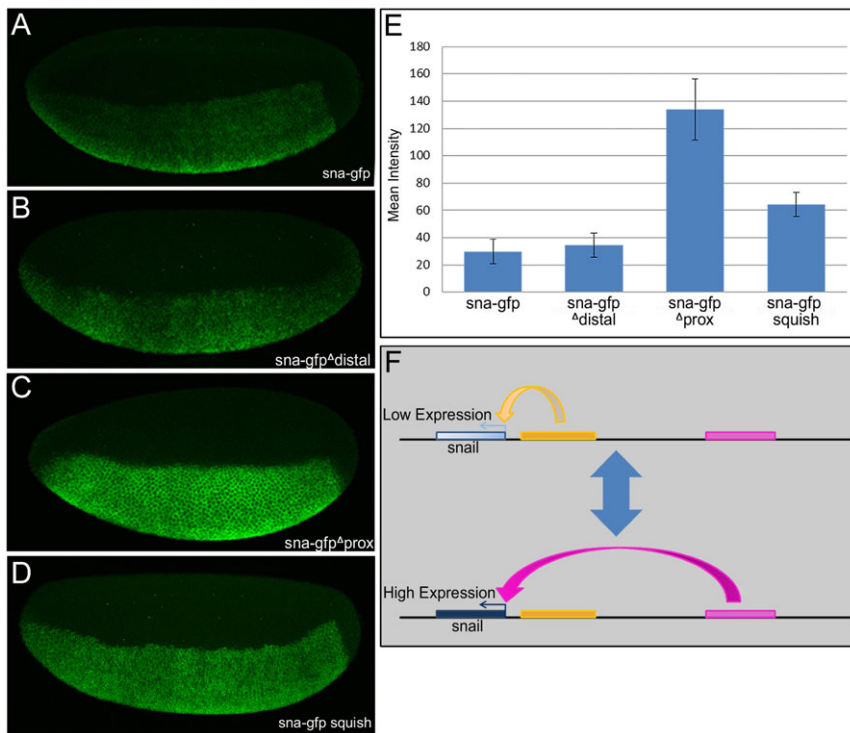

**Fig. 6. The proximal and distal CRMs influence levels of *snail* expression.** (A–D) Fluorescent in situ hybridization using a *gfp* riboprobe to recognize expression from the *gfp* reporter constructs. All images were captured under the same settings and there has been no manipulation of the brightness or contrast to allow for visual comparison of the expression levels supported by these four transgenes. (E) The mean intensity of expression in the *snail* stripe for all four constructs was quantified, showing that deletion of the proximal CRM leads to a greater than fourfold difference in expression levels. Data are mean  $\pm$  s.e.m. (F) Schematic of the interplay between the proximal and distal CRMs and the *snail* promoter. The proximal CRM drives low level expression, whereas the distal CRM drives high level expression; there is most probably a trade off between the two CRMs, effectively lowering the level of expression that is seen in the full *snail* construct to a level many times lower than that supported by the distal CRM alone.

studies in the past have suggested that repressors may require activators to bind DNA (i.e. ‘hot chromatin’ model) (see Nibu et al., 2001).

Our data show that expression of the *Drosophila snail* gene in embryos is established through integrated activity of multiple CRMs that function concurrently and, in part, through non-additive interactions. Non-additive activity of CRMs, through sharing of repressors for example, is likely more commonplace than currently appreciated. It is possible that concurrently acting CRMs function coordinately to regulate spatial domain and levels of expression in general, and may provide one explanation why genes in *Drosophila* and other animals often have multiple CRMs that support similar spatiotemporal patterns of expression.

#### Acknowledgements

We are grateful to Eric Davidson (Caltech) and to the Stathopoulos lab for helpful discussions. In addition, we thank Sagar Damle (Caltech) for advice on BAC recombineering. This work was funded through NIGMS R01 grant GM077668 (A.S.) and corresponding ARRA supplement from the NIH. Deposited in PMC for release after 12 months.

#### Competing interests statement

The authors declare no competing financial interests.

#### Supplementary material

Supplementary material for this article is available at <http://dev.biologists.org/lookup/suppl/doi:10.1242/dev.069146/-/DC1>

#### References

- Alberga, A., Boulay, J. L., Kempe, E., Denefeld, C. and Haenlin, M. (1991). The *snail* gene required for mesoderm formation in *Drosophila* is expressed dynamically in derivatives of all three germ layers. *Development* **111**, 983–992.
- Bischof, J., Maeda, R. K., Hediger, M., Karch, F. and Basler, K. (2007). An optimized transgenesis system for *Drosophila* using germ-line-specific {varphi}C31 integrases. *Proc. Natl. Acad. Sci. USA* **104**, 3312.
- Cai, H. N., Arnosti, D. N. and Levine, M. (1996). Long-range repression in the *Drosophila* embryo. *Proc. Natl. Acad. Sci. USA* **93**, 9309–9314.
- Cande, J. D., Chopra, V. S. and Levine, M. (2009). Evolving enhancer-promoter interactions within the tinman complex of the flour beetle, *Tribolium castaneum*. *Development* **136**, 3153–3160.

- Cowden, J. and Levine, M. (2002). The Snail repressor positions Notch signaling in the *Drosophila* embryo. *Development* **129**, 1785–1793.
- De Renzis, S., Yu, J., Zinzen, R. and Wieschaus, E. (2006). Dorsal-ventral pattern of Delta trafficking is established by a Snail-Tom-Neuralized pathway. *Dev. Cell* **10**, 257–264.
- de Velasco, B., Mandal, L., Mkrtychyan, M. and Hartenstein, V. (2006). Subdivision and developmental fate of the head mesoderm in *Drosophila melanogaster*. *Dev. Genes Evol.* **216**, 39–51.
- Frankel, N., Davis, G. K., Vargas, D., Wang, S., Payre, F. and Stern, D. L. (2010). Phenotypic robustness conferred by apparently redundant transcriptional enhancers. *Nature* **466**, 490–493.
- Frasch, M. and Levine, M. (1987). Complementary patterns of even-skipped and fushi tarazu expression involve their differential regulation by a common set of segmentation genes in *Drosophila*. *Genes Dev.* **1**, 981–995.
- Frasch, M., Hoey, T., Rushlow, C., Doyle, H. and Levine, M. (1987). Characterization and localization of the even-skipped protein of *Drosophila*. *EMBO J.* **6**, 749–759.
- Ghiasvand, N. M., Rudolph, D. D., Mashayekhi, M., Brzezinski, J. A. t., Goldman, D. and Glaser, T. (2011). Deletion of a remote enhancer near ATOH7 disrupts retinal neurogenesis, causing NCRNA disease. *Nat. Neurosci.* **14**, 578–586.
- Goldstein, R. E., Jimenez, G., Cook, O., Gur, D. and Paroush, Z. (1999). Hucklebein repressor activity in *Drosophila* terminal patterning is mediated by Groucho. *Development* **126**, 3747–3755.
- Hare, E. E., Peterson, B. K., Iyer, V. N., Meier, R. and Eisen, M. B. (2008). Sepsid even-skipped enhancers are functionally conserved in *Drosophila* despite lack of sequence conservation. *PLoS Genet.* **4**, e1000106.
- Hemavathy, K., Hu, X., Ashraf, S. I., Small, S. J. and Ip, Y. T. (2004). The repressor function of *snail* is required for *Drosophila* gastrulation and is not replaceable by Escargot or Worniu. *Dev. Biol.* **269**, 411–420.
- Hong, J.-W., Hendrix, D. A. and Levine, M. S. (2008). Shadow enhancers as a source of evolutionary novelty. *Science* **321**, 1314.
- Huang, A. M., Rusch, J. and Levine, M. (1997). An anteroposterior Dorsal gradient in the *Drosophila* embryo. *Genes Dev.* **11**, 1963–1973.
- Ip, Y. T., Park, R. E., Kosman, D., Bier, E. and Levine, M. (1992a). The dorsal gradient morphogen regulates stripes of rhomboid expression in the presumptive neuroectoderm of the *Drosophila* embryo. *Genes Dev.* **6**, 1728–1739.
- Ip, Y. T., Park, R. E., Kosman, D., Yazdanbakhsh, K. and Levine, M. (1992b). dorsal-twist interactions establish *snail* expression in the presumptive mesoderm of the *Drosophila* embryo. *Genes Dev.* **6**, 1518–1530.
- Ip, Y. T., Levine, M. and Bier, E. (1994). Neurogenic expression of *snail* is controlled by separable CNS and PNS promoter elements. *Development* **120**, 199–207.

- Jiang, J. and Levine, M.** (1993). Binding affinities and cooperative interactions with bHLH activators delimit threshold responses to the dorsal gradient morphogen. *Cell* **72**, 741-752.
- Jiang, J., Kosman, D., Ip, Y. T. and Levine, M.** (1991). The dorsal morphogen gradient regulates the mesoderm determinant twist in early *Drosophila* embryos. *Genes Dev.* **5**, 1881.
- Kasai, Y., Nambu, J. R., Lieberman, P. M. and Crews, S. T.** (1992). Dorsal-ventral patterning in *Drosophila*: DNA binding of *snail* protein to the single-minded gene. *Proc. Natl. Acad. Sci. USA* **89**, 3414-3418.
- Kosman, D., Ip, Y. T., Levine, M. and Arora, K.** (1991). Establishment of the mesoderm-neuroectoderm boundary in the *Drosophila* embryo. *Science* **254**, 118-122.
- Kosman, D., Mizutani, C. M., Lemons, D., Cox, W. G., McGinnis, W. and Bier, E.** (2004). Multiplex detection of RNA expression in *Drosophila* embryos. *Science* **305**, 846.
- Lee, E. C., Yu, D., Martinez de Velasco, J., Tessarollo, L., Swing, D. A., Court, D. L., Jenkins, N. A. and Copeland, N. G.** (2001). A highly efficient Escherichia coli-based chromosome engineering system adapted for recombinogenic targeting and subcloning of BAC DNA. *Genomics* **73**, 56-65.
- Leptin, M.** (1991). twist and snail as positive and negative regulators during *Drosophila* mesoderm development. *Genes Dev.* **5**, 1568-1576.
- Li, X. Y., MacArthur, S., Bourgon, R., Nix, D., Pollard, D. A., Iyer, V. N., Hechmer, A., Simirenko, L., Stapleton, M., Luengo Hendriks, C. L. et al.** (2008). Transcription factors bind thousands of active and inactive regions in the *Drosophila* blastoderm. *PLoS Biol.* **6**, e27.
- Liberman, L. M. and Stathopoulos, A.** (2009). Design flexibility in cis-regulatory control of gene expression: synthetic and comparative evidence. *Dev. Biol.* **327**, 578-589.
- Nibu, Y., Zhang, H. and Levine, M.** (2001). Local action of long-range repressors in the *Drosophila* embryo. *EMBO J.* **20**, 2246-2253.
- Ozdemir, A., Fisher, K., Pepke, S., Samanta, M., Dunipace, L., McCue, K., Zeng, L., Ogawa, N., Wold, B. and Stathopoulos, A.** (2011). High resolution mapping of Twist to DNA in *Drosophila* embryos: efficient functional analysis and evolutionary conservation. *Genome Res.* **21**, 566-577.
- Perry, M. W., Boettiger, A. N., Bothma, J. P. and Levine, M.** (2010). Shadow enhancers foster robustness of *Drosophila* gastrulation. *Curr. Biol.* **20**, 1562-1567.
- Prazak, L., Fujioka, M. and Gergen, J. P.** (2010). Non-additive interactions involving two distinct elements mediate sloppy-paired regulation by pair-rule transcription factors. *Dev. Biol.* **344**, 1048-1059.
- Reuter, R. and Leptin, M.** (1994). Interacting functions of snail, twist and huckebein during the early development of germ layers in *Drosophila*. *Development* **120**, 1137-1150.
- Sandmann, T., Girardot, C., Brehme, M., Tongprasit, W., Stolc, V. and Furlong, E. E.** (2007). A core transcriptional network for early mesoderm development in *Drosophila melanogaster*. *Genes Dev.* **21**, 436-449.
- Small, S., Arnosti, D. N. and Levine, M.** (1993). Spacing ensures autonomous expression of different stripe enhancers in the even-skipped promoter. *Development* **119**, 762-772.
- Small, S., Blair, A. and Levine, M.** (1996). Regulation of two pair-rule stripes by a single enhancer in the *Drosophila* embryo. *Dev. Biol.* **175**, 314-324.
- Stathopoulos, A. and Levine, M.** (2005). Localized repressors delineate the neurogenic ectoderm in the early *Drosophila* embryo. *Dev. Biol.* **280**, 482-493.
- Venken, K. J., He, Y., Hoskins, R. A. and Bellen, H. J.** (2006). P[acman]: a BAC transgenic platform for targeted insertion of large DNA fragments in *D. melanogaster*. *Science* **314**, 1747-1751.
- Von Ohlen, T. L., Harvey, C. and Panda, M.** (2007). Identification of an upstream regulatory element reveals a novel requirement for Ind activity in maintaining ind expression. *Mech. Dev.* **124**, 230-236.
- Warming, S., Costantino, N., Court, D. L., Jenkins, N. A. and Copeland, N. G.** (2005). Simple and highly efficient BAC recombineering using galK selection. *Nucleic Acids Res.* **33**, e36.
- Xiong, N., Kang, C. and Raulet, D. H.** (2002). Redundant and unique roles of two enhancer elements in the TCRgamma locus in gene regulation and gammadelta T cell development. *Immunity* **16**, 453-463.
- Zeitlinger, J., Zinzen, R. P., Stark, A., Kellis, M., Zhang, H., Young, R. A. and Levine, M.** (2007). Whole-genome ChIP-chip analysis of Dorsal, Twist, and Snail suggests integration of diverse patterning processes in the *Drosophila* embryo. *Genes Dev.* **21**, 385-390.
- Zinzen, R. P., Senger, K., Levine, M. and Papatsenko, D.** (2006). Computational models for neurogenic gene expression in the *Drosophila* embryo. *Curr. Biol.* **16**, 1358-1365.
